# Supplementary material for: Vertically stacked Bi2Se3/MoTe2 heterostructure with large band offsets for nanoelectronics
Source: Royal Society of Chemistry journal article supplement (doi:10.1039/d1nr04281e), 2021-01-01
Supplement: d1nr04281e1.pdf [file d1nr04281e1.pdf]

**Supporting information for**

**Vertically Stacked Bi<sub>2</sub>Se<sub>3</sub>/MoTe<sub>2</sub> Heterostructure with Large Band Offsets for  
Nanoelectronics**

Lin Tao<sup>1,2</sup>, Bin Yao<sup>1,2\*</sup>, Qian Yue<sup>3</sup>, Zhiying, Dan<sup>3</sup>, Peiting Wen<sup>3</sup>, Mengmeng Yang<sup>4</sup>,  
Zhaoqiang Zheng<sup>4</sup>, Dongxiang Luo<sup>3</sup>, Weijun Fan<sup>5</sup>, Xiaozhou Wang<sup>3\*</sup>, Wei Gao<sup>3\*</sup>

<sup>1</sup> State Key Lab of Superhard Material, and College of Physics, Jilin University,  
Changchun 130012, P. R. China

<sup>2</sup> Key Laboratory of Physics and Technology for Advanced Batteries (Ministry of  
Education), College of Physics, Jilin University, Changchun, 130012, P. R. China

<sup>3</sup> Institute of Semiconductors, South China Normal University, Guangzhou 510631, P.  
R. China

<sup>4</sup> School of Materials and Energy, Guangdong University of Technology, Guangzhou  
510006, P. R. China.

<sup>5</sup> School of Electrical and Electronic Engineering, Nanyang Technological University,  
639798, Singapore.

**\*Corresponding authors:** Bin Yao, Email: binyao@jlu.edu.cn Xiaozhou Wang,  
Email: wxzanu@outlook.com Wei Gao, Email: gaowei317040@126.com



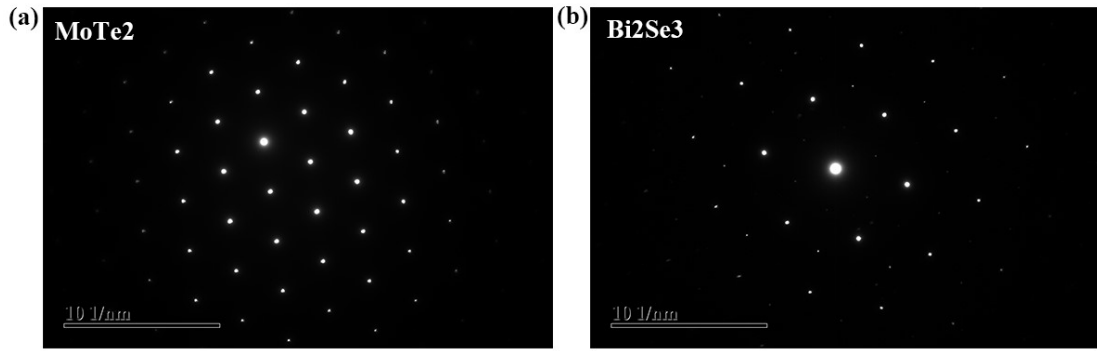

**Fig. S3** SAED patterns of (a) individual MoTe<sub>2</sub> nanosheets and (b) individual Bi<sub>2</sub>Se<sub>3</sub> nanosheets

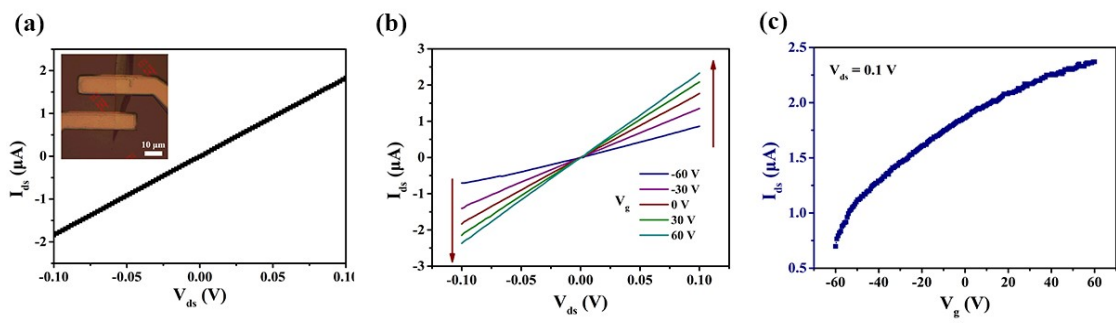

**Fig. S4** Electrical performance of another ultrathin Bi<sub>2</sub>Se<sub>3</sub> FET. **a.**  $I_{ds}$ - $V_{ds}$  curve. **b.** Output curves at various gate voltages. **c.** Transfer characteristic at  $V_{ds} = 0.1$  V scanning from -60 V to 60 V

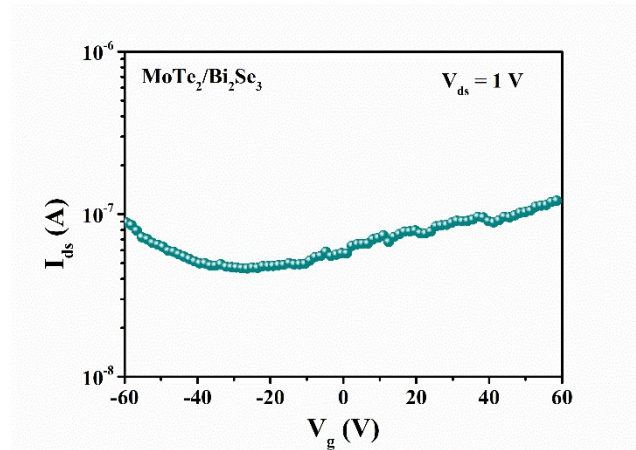

**Fig. S5** Transfer curve of the heterojunction device I at  $V_{ds} = 1$  V

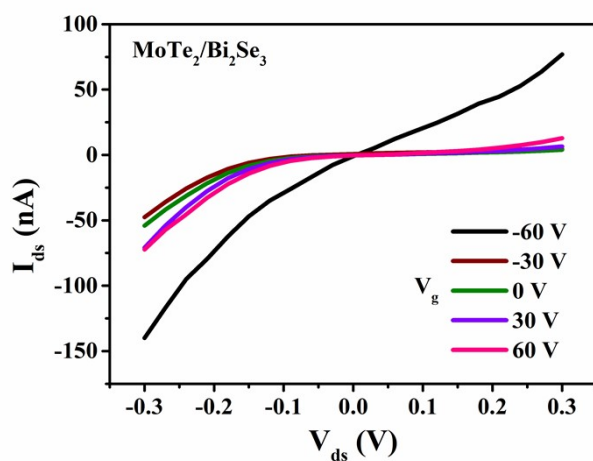

**Fig. S6** Output curves of the heterojunction device I at various gate voltages

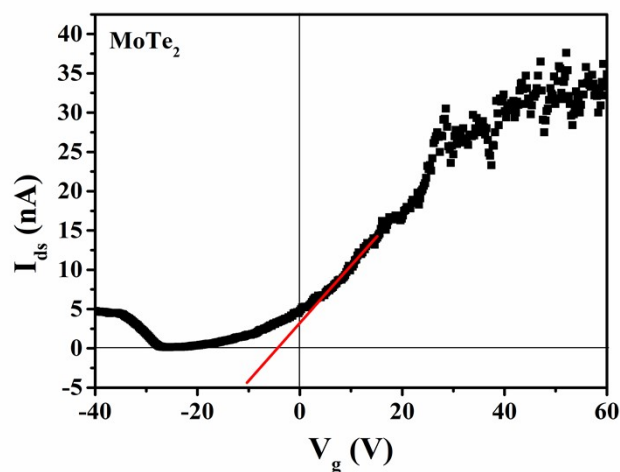

**Fig. S7** Transfer curve of MoTe<sub>2</sub> FET in device I at  $V_g$  scanning from -40 V to 60 V. The threshold voltage ( $V_{th}$ ) can be extracted from the intersection point between redfitting curve and the horizontal line.

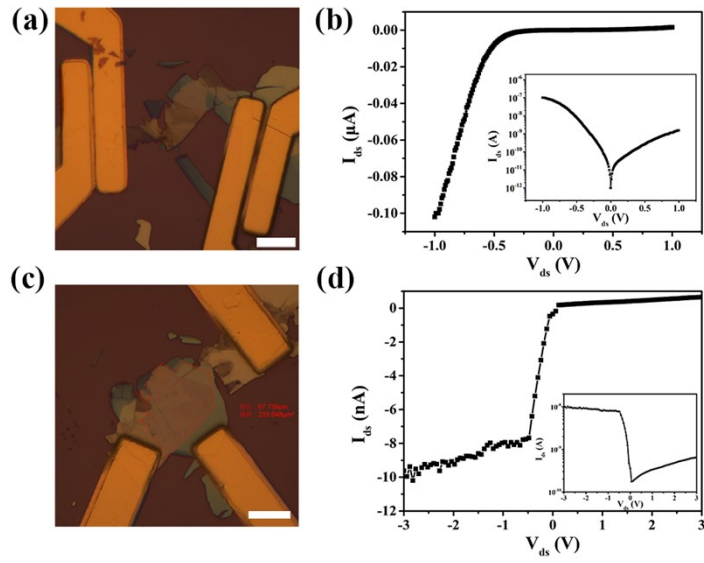

**Fig. S8** Electrical properties of another two  $\text{MoTe}_2/\text{Bi}_2\text{Se}_3$  heterostructure devices. (a) OM image of Device II, (b) the corresponding  $I_{ds}$ - $V_{ds}$  curve at linear form, Inset is the logarithmic scale. (c) OM image of Device III, (d) the corresponding  $I_{ds}$ - $V_{ds}$  curve at linear scale, Inset is the logarithmic scale.

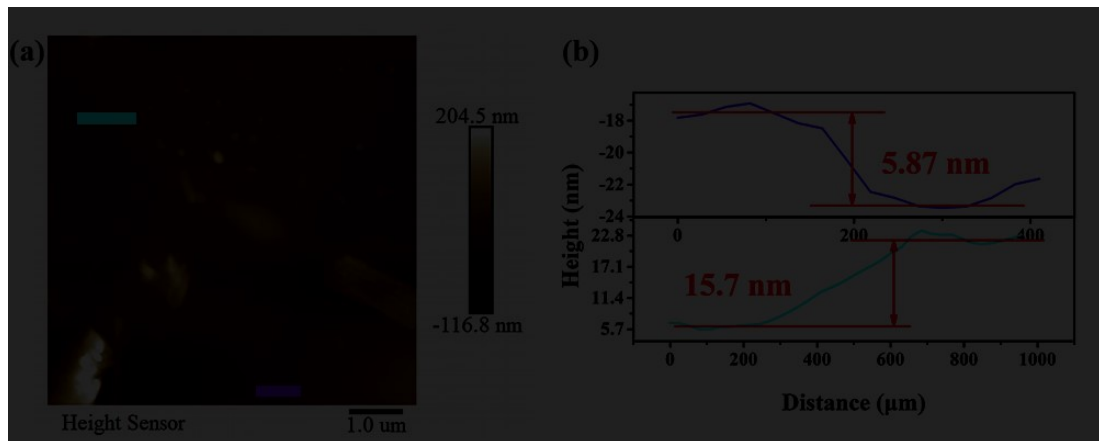

**Fig. S9** (a) Topological AFM image of  $\text{Bi}_2\text{Se}_3/\text{MoTe}_2$  in device VI. (b) the corresponding height profile along the cambrige blue and violet line, respectively.

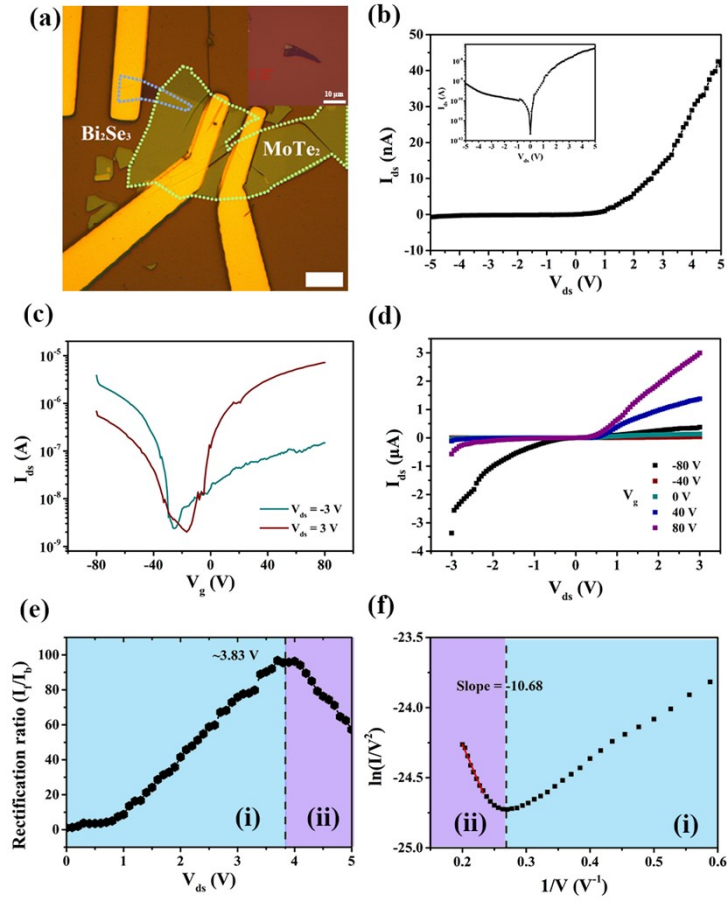

**Fig. S10 Electrical properties of another MoTe<sub>2</sub>/thinner Bi<sub>2</sub>Se<sub>3</sub> heterostructure devices.** (a) OM image of Device IV. The scale bar is 10 μm. Inset is the OM image of the chosen Bi<sub>2</sub>Se<sub>3</sub> nanosheets. (b)  $I_{ds}$ - $V_{ds}$  curve at linear scale. Inset is the semi-logarithmic scale. (c) Transfer curves at  $V_{ds} = -3$  V/3 V, (d) Output curve at linear scale from  $V_g = -80$  to 80 V. (e) rectification ratio ( $I/I_b$ ) at the same  $V_{ds}$  with the increment of  $V_{ds}$ . (f) Fowler-Nordheim plot for backward current. Noticement: Bi<sub>2</sub>Se<sub>3</sub> is Drain terminal and 2H-MoTe is Source terminal.

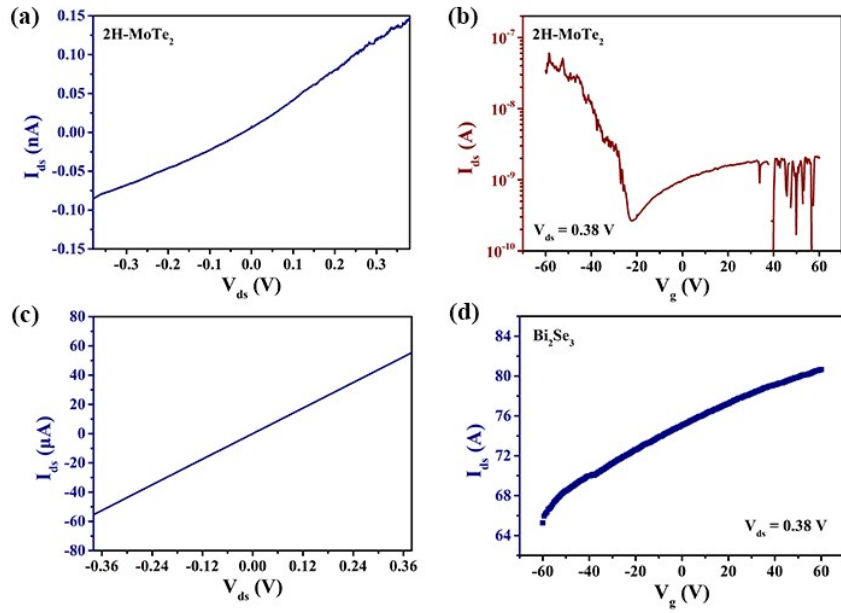

**Fig. S11** Electrical properties of individual MoTe<sub>2</sub> and Bi<sub>2</sub>Se<sub>3</sub> at  $V_{ds} = 0.38$  V in device I.  $I_{ds}$ - $V_{ds}$  curves for (a) MoTe<sub>2</sub> and (c) Bi<sub>2</sub>Se<sub>3</sub>; Transfer characteristics for (b) MoTe<sub>2</sub> and (d) Bi<sub>2</sub>Se<sub>3</sub>.

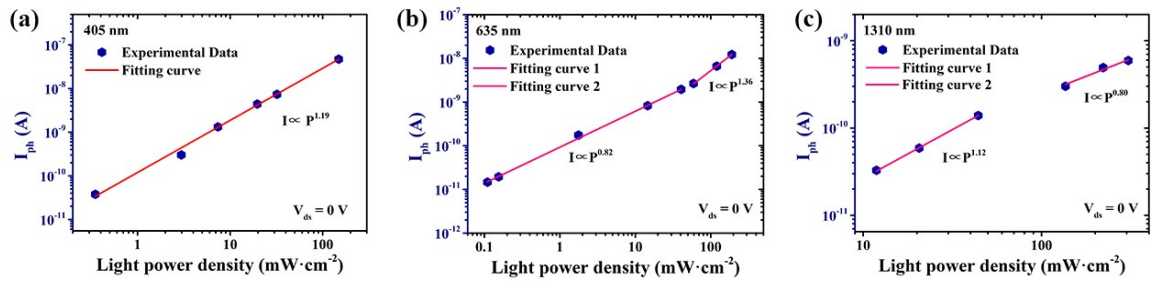

**Fig. S12** The fitting relationship of the logarithmic plots between photocurrent and light power density under (a) 405 nm, (b) 635 nm and (c) 1310 nm illumination.

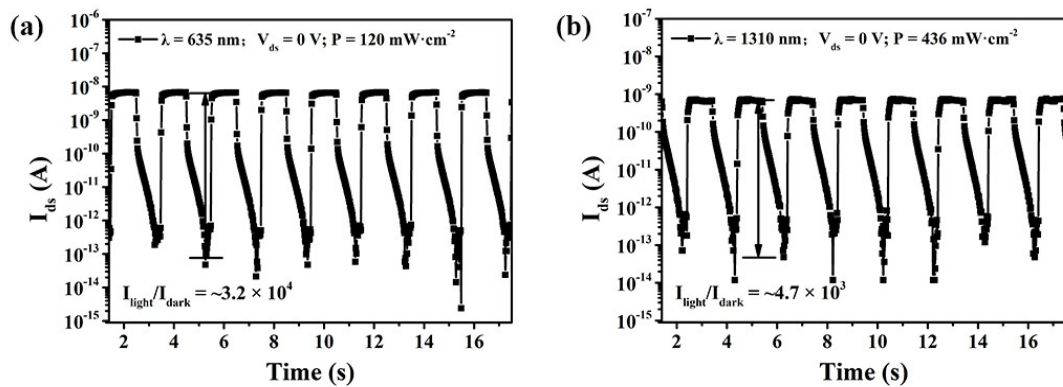

**Fig. S13** Time trace of  $I_{ds}$  at  $V_{ds} = 0$  V under (a) 635 nm, (b) 1310 nm illumination.

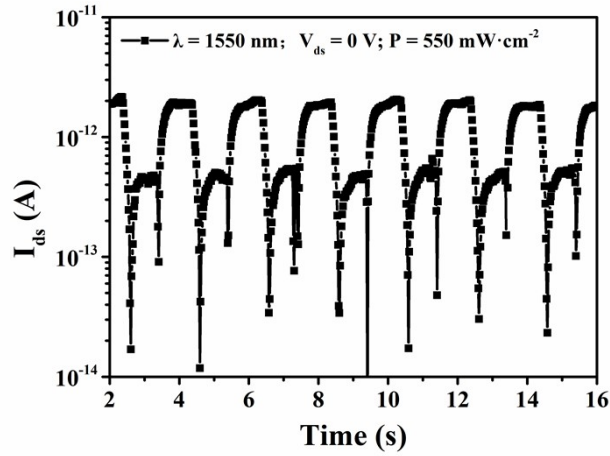

**Fig. S14** Time trace of  $I_{ds}$  at  $V_{ds} = 0$  V under 1550 nm illumination.

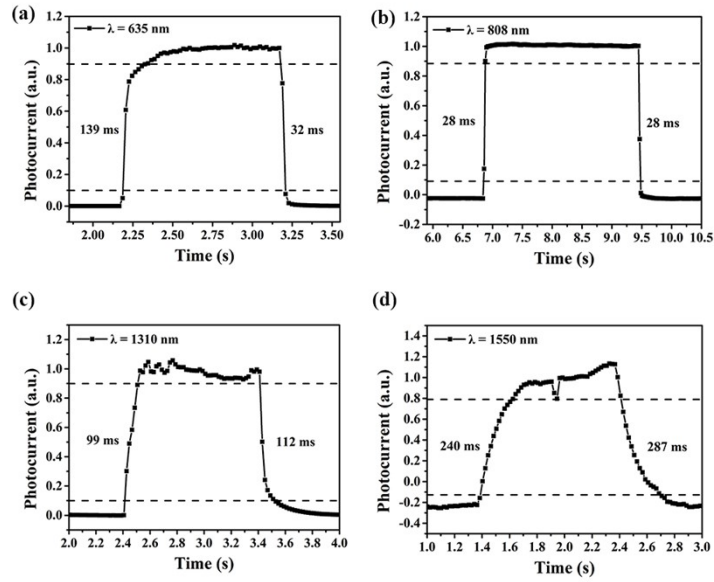

**Fig. S15** The corresponding rise and decay time of the device I at  $V_{ds} = 0$  V under **a.** 635 nm ( $P = 120$  mW/cm<sup>2</sup>). **b.** 808 nm ( $P = 146$  mW/cm<sup>2</sup>). **c.** 1310 nm ( $P = 350$  mW/cm<sup>2</sup>) and **d.** 1550 nm ( $P = 550$  mW/cm<sup>2</sup>) illuminations.



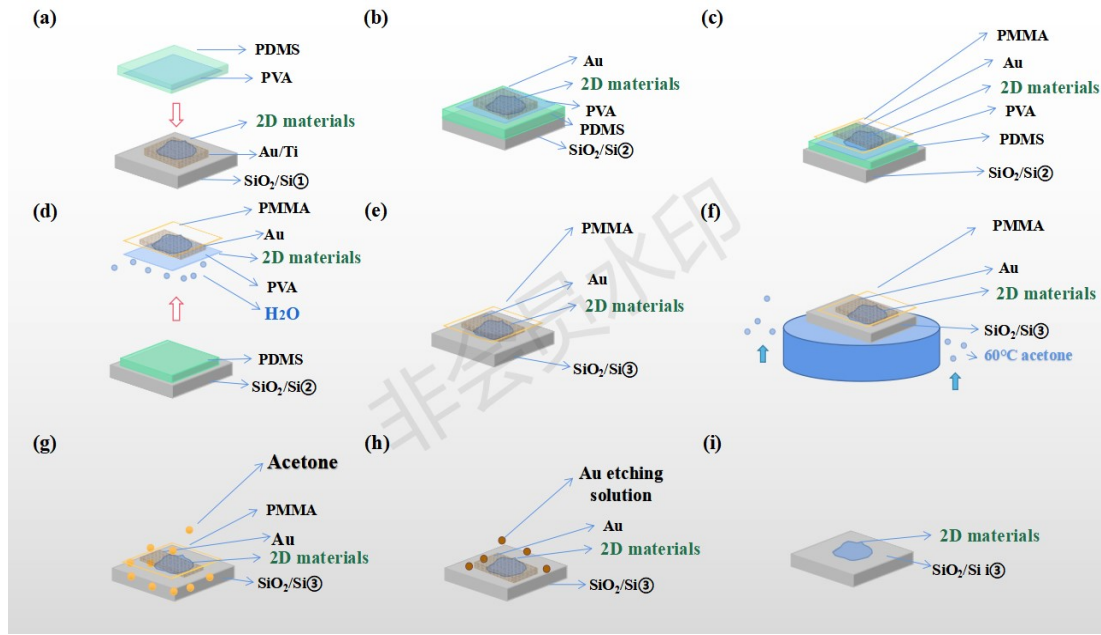

**Fig. S16** 3D schematic image of our novel exfoliation and transfer process for Bi<sub>2</sub>Se<sub>3</sub> nanosheets.

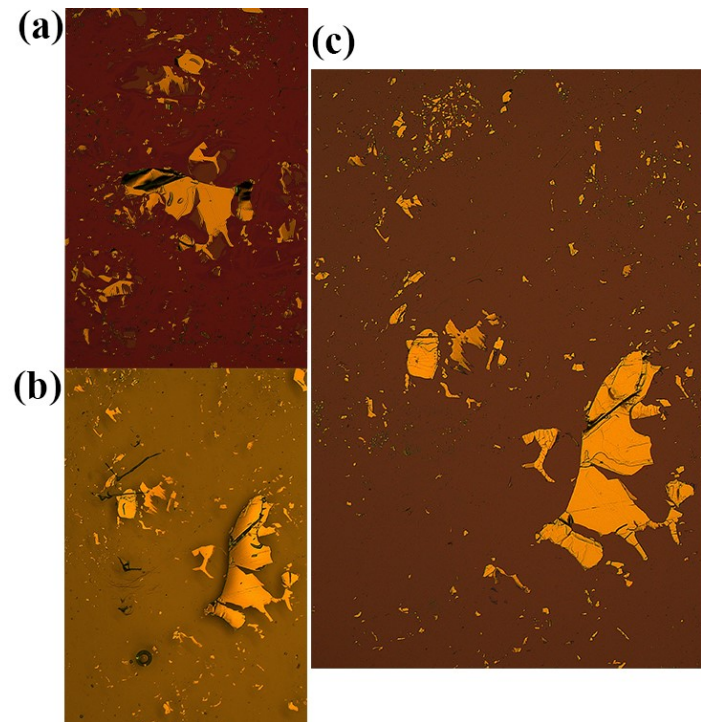

**Fig. S17** Optical images of the Au-assisted exfoliation and transfer process: (a) large-scale Bi<sub>2</sub>Se<sub>3</sub> samples on Au/Ti/SiO<sub>2</sub>/Si substrate; (b) large-scale Bi<sub>2</sub>Se<sub>3</sub> samples on PVA/PDMS film; (c) large-scale Bi<sub>2</sub>Se<sub>3</sub> samples on final SiO<sub>2</sub>/Si substrate.

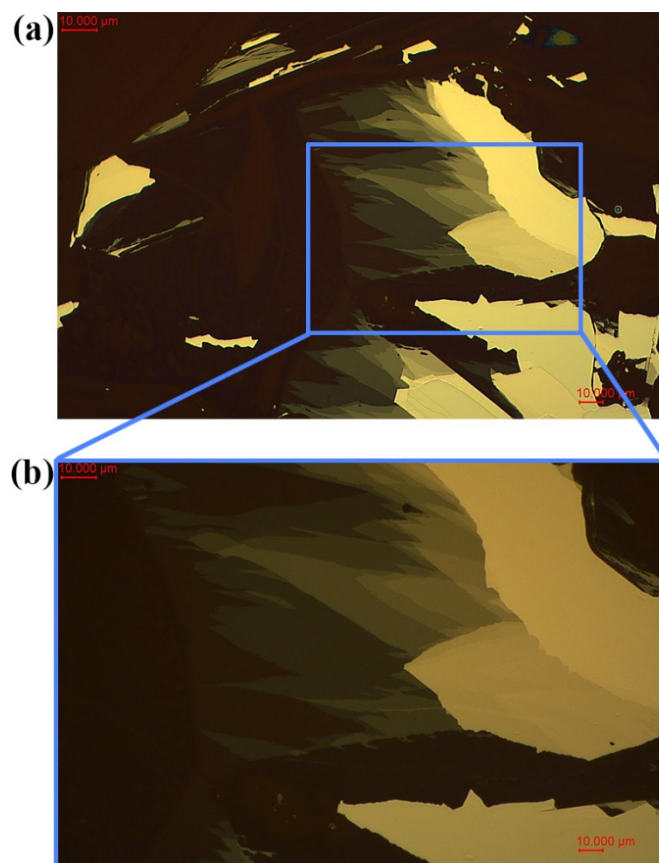

**Fig. S18** Ultra-large Bi<sub>2</sub>Se<sub>3</sub> nanosheets on Au/Ti/SiO<sub>2</sub>/Si substrate at (a) 10 X and 50 X amplification.

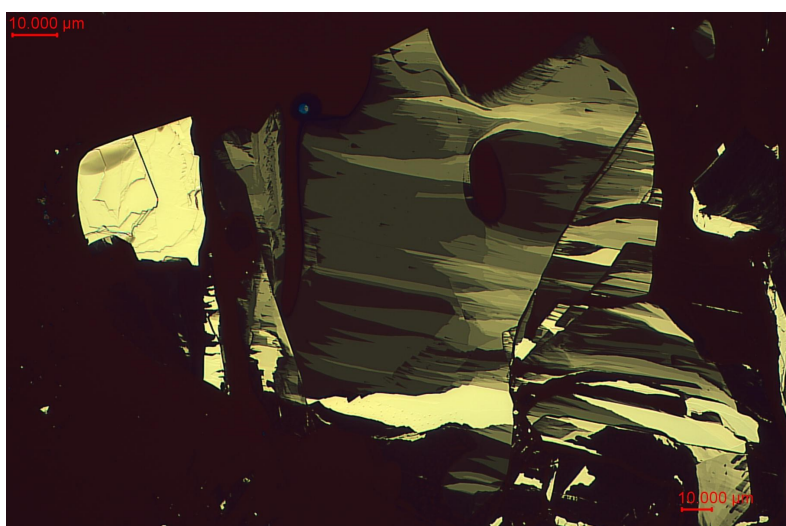

**Fig. S19** Another ultra-large Bi<sub>2</sub>Se<sub>3</sub> nanosheets on Au/Ti/SiO<sub>2</sub>/Si substrate at 20 X amplification.
